# Supplementary material for: Phosphoribosyl pyrophosphate synthetases 2 knockdown inhibits prostate cancer progression by suppressing cell cycle and inducing cell apoptosis
Source: PubMed Central journal article supplement (PMC6959080; doi:10.7150/jca.37401), 2020-01-01
Supplement: jcav11p1027s1.pdf [file jcav11p1027s1.pdf]

# Phosphoribosyl pyrophosphate synthetases 2 knockdown inhibits prostate cancer progression by suppressing cell cycle and inducing cell apoptosis

**Running title:** Role of PRPS2 in prostate cancer

Hui Qiao<sup>3#</sup>, Xiao Tan<sup>2#</sup>, Dao-jun Lv<sup>1,2#</sup>, Rong-wei Xing<sup>5</sup>, Fang-peng Shu<sup>2</sup>, Chuan-fan Zhong<sup>2</sup>, Chun Li<sup>3</sup>, Ya-guang Zou<sup>4\*</sup>, Xiang-ming Mao<sup>1,2\*</sup>

<sup>1</sup> Department of Urology, Nanfang Hospital, Southern Medical University, 510515, Guangzhou, Guangdong Province, China.

<sup>2</sup> Department of Urology, Zhujiang Hospital, Southern Medical University, 510282, Guangzhou, Guangdong Province China.

<sup>3</sup> Nursing Department, Nanfang Hospital, Southern Medical University, 510515, Guangzhou, Guangdong Province, China.

<sup>4</sup> Department of Stomatology, Nanfang Hospital, Southern Medical University, 510515, Guangzhou, Guangdong Province, China.

<sup>5</sup> Department of Urology, the Affiliated Weihai Second Municipal Hospital of Qingdao University, 264200, Weihai, Shandong Province, China.

#These authors contributed equally to this work.

\*Correspondence to: Xiang-ming Mao, Department of Urology, Nanfang Hospital, Southern Medical University. 1838 Guangzhou Avenue North, Tonghe, Baiyun District, Guangzhou, Guangdong Province, China; Phone: +86 13802503635; Fax: +86-20-61641047; Email: [mxm631221@126.com](mailto:mxm631221@126.com). Or, Ya-guang Zou, Department of Stomatology, Nanfang Hospital, Southern Medical University. 1838 Guangzhou Avenue North, Tonghe, Baiyun District, Guangzhou, Guangdong Province, China; Phone: +86-18620050609; Fax: +86-20-61641047; Email : [18620050609@163.com](mailto:18620050609@163.com).

Authors : Hui Qiao: [nfyyjxb@163.com](mailto:nfyyjxb@163.com); Xiao Tan: [18073125587@163.com](mailto:18073125587@163.com); Dao-jun Lv: [15914336377@163.com](mailto:15914336377@163.com); Rong, Wei Xing: [XRW5096@sina.com](mailto:XRW5096@sina.com); Fang-peng Shu, [374561063@qq.com](mailto:374561063@qq.com); Chuan-fan Zhong: [1466778739@qq.com](mailto:1466778739@qq.com); Chun Li: [120601847@qq.com](mailto:120601847@qq.com).

## Supplementary data

1 2 3 4 5 6 7 8 9 10 11 12 13 14 15 16

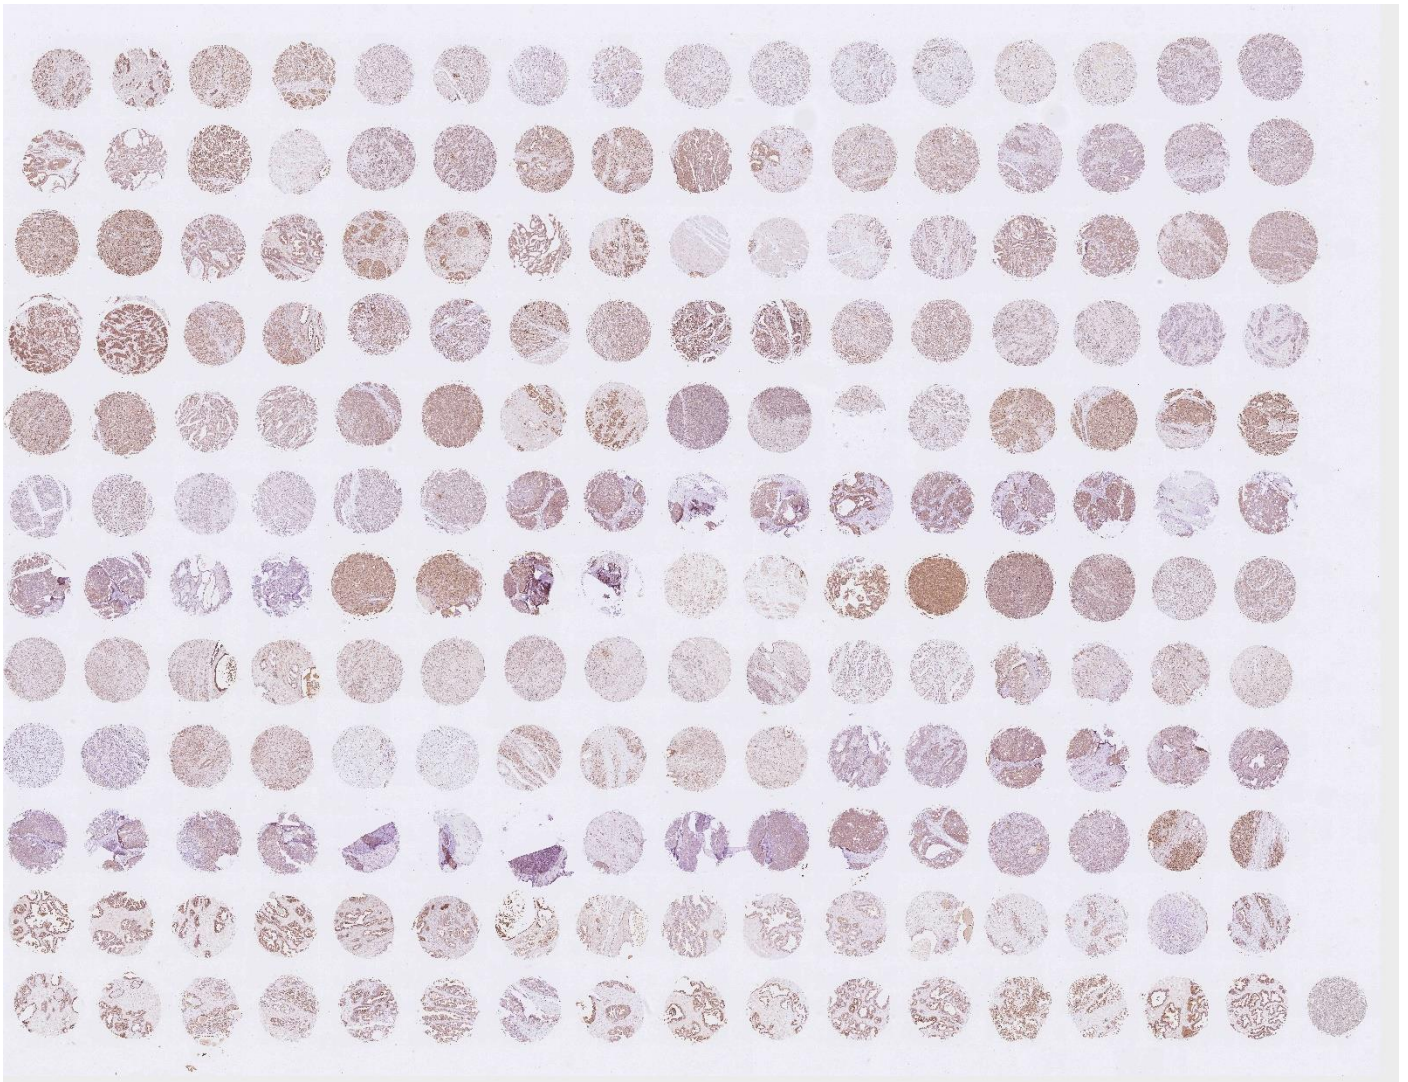

**Supplemental Figure 1:** The immunohistochemistry image of the whole TMA (scale bar = 1.5 mm).

**Supplemental Table 1:** The detailed clinic parameters of enrolled patients.
